# Supplementary material
Source: PubMed Central journal article supplement (PMC3908455)
Supplement: NIHMS252661-supplement-4.pdf [file NIHMS252661-supplement-4.pdf]

# Declaration of competing financial interests

JOURNAL: Nature

MANUSCRIPT NUMBER: 2010-02-02513C

MANUSCRIPT TITLE: A critical role for IGF-II in memory consolidation  
and enhancement

Please check one of the following:

1. I declare that the authors have no competing interests as defined by Nature Publishing Group, or other interests that might be perceived to influence the results and discussion reported in this paper.
2. The authors have competing interests as defined by Nature Publishing Group, or other interests that might be perceived to influence the results and discussion reported in this paper.

If you have checked 2, please specify the competing interests:

Patent pending on IGF-II as a strategy to enhance memory.

SIGNATURE: 

NAME IN BLOCK CAPITALS:

CRISTINA ALBERINI

DATE:

Nov 3<sup>rd</sup>, 2010

The Nature journals' competing financial interests policy is defined, and further details of our procedures are explained, at:

[http://www.nature.com/authors/editorial\\_policies/competing.html](http://www.nature.com/authors/editorial_policies/competing.html)
